# Supplementary material for: O157:H7 and O104:H4 Vero/Shiga toxin-producing Escherichia coli outbreaks: respective role of cattle and humans
Source: Springer Nature journal article supplement (doi:10.1186/1297-9716-43-13), 2012-02-13

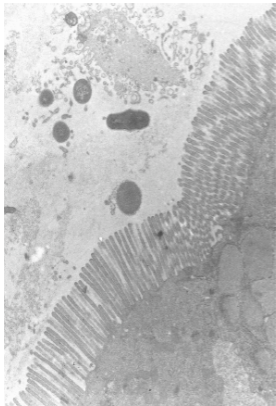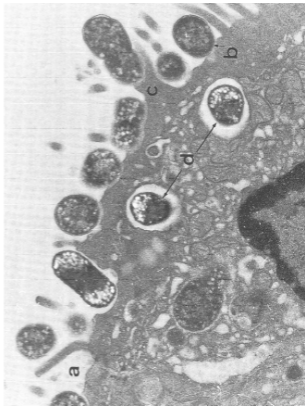

Supplement: 13567_2011_132_MOESM2_ESM.pdf [file 13567_2011_132_MOESM2_ESM.pdf]
